# Supplementary material for: Comprehensive Study of Germline Mutations and Double-Hit Events in Esophageal Squamous Cell Cancer
Source: Front Oncol. 2021 Apr 6;11:637431. doi: 10.3389/fonc.2021.637431 (PMC8056176; doi:10.3389/fonc.2021.637431)
Supplement: Supplementary file 12 [file Table_12.XLSX]

## Sheet: Sheet1
Supplementary Table 12. The somatic/somatic double-hit events ( without pathogenic germline mutations) in 571 ESCCs.
Sample	Somatic mutation									Somatic mutation								Allele loss SCNV
	Hugo_Symbol	Chromosome	Start_position	End_position	Reference_Allele	Tumor_Seq_Allele	Variant_Classification	cDNA_Change	Protein_Change	Chromosome	Start_position	End_position	Reference_Allele	Tumor_Seq_Allele	Variant_Classification	cDNA_Change	Protein_Change	Chromosome	Start_position	End_position
ESCC-0407	TP53	17	7577538	7577538	C	T	Missense_Mutation	c.743G>A	p.R248Q	17	7572939	7572940	GA	T	Frame_Shift	c.1169_1170delinsA	p.P390fs*	-	-	-
ESCC-0457	TP53	17	7578407	7578407	G	C	Missense_Mutation	c.523C>G	p.R175G	17	7577115	7577115	A	-	Frame_Shift_Del	c.823delT	p.C275fs	-	-	-
ESCC-0131	TP53	17	7578175	7578175	A	C	Splice_Site	-	-	17	7577569	7577569	A	G	Missense_Mutation	c.712T>C	p.C238R	-	-	-
ESCC-0112	TP53	17	7578524	7578524	G	A	Nonsense_Mutation	c.406C>T	p.Q136*	17	7578217	7578217	G	A	Missense_Mutation	c.632C>T	p.T211I	-	-	-
ESCC-0506	TP53	17	7577082	7577082	C	A	Nonsense_Mutation	c.856G>T	p.E286*	17	7578394	7578394	T	C	Missense_Mutation	c.536A>G	p.H179R	-	-	-
ESCC-0256	TP53	17	7579521	7579521	C	A	Nonsense_Mutation	c.166G>T	p.E56*	17	7577137	7577137	C	-	Frame_Shift_Del	c.801delG	p.R267fs	-	-	-
ESCC-0102	TP53	17	7577100	7577100	T	A	Nonsense_Mutation	c.838A>T	p.R280*	17	7578212	7578212	G	A	Nonsense_Mutation	c.637C>T	p.R213*	-	-	-
ESCC-0467	TP53	17	7579406	7579406	G	T	Nonsense_Mutation	c.281C>A	p.S94*	17	7578469	7578469	C	-	Frame_Shift_Del	c.461delG	p.G154fs	-	-	-
ESCC-0513	FAT1	4	187539860	187539860	G	C	Missense_Mutation	c.7880C>G	p.S2627C	4	187542005	187542005	G	C	Nonsense_Mutation	c.5735C>G	p.S1912*	-	-	-
ESCC-0483	FAT1	4	187531152	187531153	-	A	Frame_Shift_Ins	c.9870_9871insT	p.E3291fs	4	187549706	187549706	C	T	Missense_Mutation	c.4535G>A	p.G1512D	-	-	-
ESCC-0430	TP53	17	7578556	7578556	T	A	Splice_Site	-	-	17	7578457	7578457	C	T	Missense_Mutation	c.473G>A	p.R158H	-	-	-
ESCC-0321	TP53	17	7576863	7576864	AA	-	Frame_Shift_Del	c.982_983delTT	p.F328fs	17	7576865	7576865	A	C	Nonsense_Mutation	c.981T>G	p.Y327*	-	-	-
ESCC-0023	TP53	17	7577120	7577120	C	A	Missense_Mutation	c.818G>T	p.R273L	17	7579312	7579312	C	T	Splice_Site	c.375G>A	p.T125T	-	-	-
ESCC-0428	TP53	17	7577114	7577114	C	A	Missense_Mutation	c.824G>T	p.C275F	17	7577547	7577547	C	A	Missense_Mutation	c.734G>T	p.G245V	-	-	-
ESCC-0239	TP53	17	7579361	7579361	A	G	Missense_Mutation	c.326T>C	p.F109S	17	7578475	7578475	G	A	Missense_Mutation	c.455C>T	p.P152L	-	-	-
ESCC-0414	TP53	17	7578407	7578407	G	C	Missense_Mutation	c.523C>G	p.R175G	17	7579359	7579359	G	A	Missense_Mutation	c.328C>T	p.R110C	-	-	-
ESCC-0238	TP53	17	7578212	7578212	G	A	Nonsense_Mutation	c.637C>T	p.R213*	17	7577124	7577124	C	A	Missense_Mutation	c.814G>T	p.V272L	-	-	-
ESCC-0251	TP53	17	7577120	7577120	C	A	Missense_Mutation	c.818G>T	p.R273L	17	7577604	7577604	C	-	Frame_Shift_Del	c.677delG	p.G226fs	-	-	-
ESCC-0255	ERBB4	2	212488682	212488682	C	A	Missense_Mutation	c.2167G>T	p.V723F	2	212589863	212589863	T	A	Missense_Mutation	c.679A>T	p.S227C	-	-	-
ESCC-0419	TP53	17	7578527	7578527	A	G	Missense_Mutation	c.403T>C	p.C135R	17	7578212	7578212	G	A	Nonsense_Mutation	c.637C>T	p.R213*	-	-	-
ESCC-0232	FAT1	4	187524868	187524869	-	T	Frame_Shift_Ins	c.10811_10812insA	p.K3604fs	4	187629207	187629208	-	A	Frame_Shift_Ins	c.1774_1775insT	p.S592fs	-	-	-
ESCC-0536	KMT2D	12	49445818	49445818	C	A	Nonsense_Mutation	c.1648G>T	p.E550*	12	49440519	49440519	C	G	Missense_Mutation	c.4291G>C	p.E1431Q	-	-	-
ESCC-0059	TP53	17	7577538	7577538	C	T	Missense_Mutation	c.743G>A	p.R248Q	17	7578395	7578395	G	C	Missense_Mutation	c.535C>G	p.H179D	-	-	-
ESCC-0177	TP53	17	7577541	7577541	T	A	Missense_Mutation	c.740A>T	p.N247I	17	7578442	7578442	T	C	Missense_Mutation	c.488A>G	p.Y163C	-	-	-
ESCC-0452	TP53	17	7577538	7577538	C	T	Missense_Mutation	c.743G>A	p.R248Q	17	7577022	7577022	G	A	Nonsense_Mutation	c.916C>T	p.R306*	-	-	-
ESCC-0263	FAT1	4	187539192	187539192	G	A	Nonsense_Mutation	c.8548C>T	p.Q2850*	4	187540997	187540997	G	A	Missense_Mutation	c.6743C>T	p.P2248L	-	-	-
ESCC-0287	FANCD2	3	10131999	10131999	G	T	Missense_Mutation	c.3707G>T	p.R1236L	3	10130136	10130136	C	T	Missense_Mutation	c.3470C>T	p.S1157F	-	-	-
ESCC-0197	TP53	17	7577543	7577543	C	G	Missense_Mutation	c.738G>C	p.M246I	17	7579321	7579322	CA	-	Frame_Shift_Del	c.365_366delTG	p.V122fs	-	-	-
ESCC-0533	TP53	17	7578461	7578461	C	A	Missense_Mutation	c.469G>T	p.V157F	17	7578212	7578212	G	A	Nonsense_Mutation	c.637C>T	p.R213*	-	-	-
ESCC-0413	KMT2D	12	49420423	49420423	C	A	Missense_Mutation	c.15326G>T	p.C5109F	12	49441854	49441854	T	G	Splice_Site	-	-	-	-	-
ESCC-0034	TP53	17	7579514	7579515	-	GGTC	Frame_Shift_Ins	c.172_173insGACC	p.-57fs	17	7579358	7579358	C	A	Missense_Mutation	c.329G>T	p.R110L	-	-	-
ESCC-0025	TP53	17	7578500	7578500	G	A	Nonsense_Mutation	c.430C>T	p.Q144*	17	7578190	7578190	T	C	Missense_Mutation	c.659A>G	p.Y220C	-	-	-
ESCC-0254	TP53	17	7578212	7578212	G	A	Nonsense_Mutation	c.637C>T	p.R213*	17	7577094	7577094	G	A	Missense_Mutation	c.844C>T	p.R282W	-	-	-
ESCC-0065	TP53	17	7578280	7578280	G	A	Missense_Mutation	c.569C>T	p.P190L	17	7577153	7577179	CCACTACTCAGGATAGGAAAAGAGAAG	-	Splice_Site	c.783_785delCTTCTCTTTTCCTATCCTGAGTAGTGG	p.F262del	-	-	-
ESCC-0053	TP53	17	7577105	7577105	G	T	Missense_Mutation	c.833C>A	p.P278H	17	7577518	7577518	T	A	Missense_Mutation	c.763A>T	p.I255F	-	-	-
ESCC-0571	TP53	17	7578188	7578188	C	A	Nonsense_Mutation	c.661G>T	p.E221*	17	7577547	7577547	C	T	Missense_Mutation	c.734G>A	p.G245D	-	-	-
ESCC-0366	FAT1	4	187630588	187630588	G	A	Nonsense_Mutation	c.394C>T	p.R132*	4	187510197	187510197	G	-	Frame_Shift_Del	c.13316delC	p.P4439fs	-	-	-
ESCC-0437	PTEN	10	89717762	89717762	A	T	Nonsense_Mutation	c.787A>T	p.K263*	10	89692904	89692904	C	T	Nonsense_Mutation	c.388C>T	p.R130*	-	-	-
ESCC-0333	TP53	17	7577548	7577548	C	T	Missense_Mutation	c.733G>A	p.G245S	17	7577018	7577018	C	T	Splice_Site	-	-	-	-	-
ESCC-0003	TP53	17	7578475	7578475	G	-	Frame_Shift_Del	c.455delC	p.P153fs	17	7578190	7578190	T	C	Missense_Mutation	c.659A>G	p.Y220C	-	-	-
ESCC-0370	FAT1	4	187535395	187535396	-	A	Frame_Shift_Ins	c.9178_9179insT	p.Y3060fs	4	187540881	187540882	AC	-	Frame_Shift_Del	c.6858_6859delGT	p.QS2286fs	-	-	-
ESCC-0157	TP53	17	7578291	7578291	T	C	Splice_Site	-	-	17	7578475	7578475	G	-	Frame_Shift_Del	c.455delC	p.P153fs	-	-	-
ESCC-0451	TP53	17	7579312	7579312	C	A	Splice_Site	c.375G>T	p.T125T	17	7577058	7577058	C	A	Nonsense_Mutation	c.880G>T	p.E294*	-	-	-
ESCC-0121	TP53	17	7578265	7578265	A	T	Missense_Mutation	c.584T>A	p.I195N	17	7578235	7578235	T	C	Missense_Mutation	c.614A>G	p.Y205C	-	-	-
ESCC-0107	KMT2D	12	49420474	49420474	C	T	Missense_Mutation	c.15275G>A	p.C5092Y	12	49441761	49441761	C	T	Missense_Mutation	c.4223G>A	p.C1408Y	-	-	-
ESCC-0305	TP53	17	7578403	7578403	C	T	Missense_Mutation	c.527G>A	p.C176Y	17	7578388	7578388	C	T	Missense_Mutation	c.542G>A	p.R181H	-	-	-
ESCC-0408	TP53	17	7578439	7578439	T	-	Frame_Shift_Del	c.491delA	p.K164fs	17	7577022	7577022	G	A	Nonsense_Mutation	c.916C>T	p.R306*	-	-	-
ESCC-0377	TP53	17	7578394	7578394	T	A	Missense_Mutation	c.536A>T	p.H179L	17	7578457	7578457	C	T	Missense_Mutation	c.473G>A	p.R158H	-	-	-
ESCC-0301	TP53	17	7577538	7577538	C	T	Missense_Mutation	c.743G>A	p.R248Q	17	7578493	7578493	C	T	Nonsense_Mutation	c.437G>A	p.W146*	-	-	-
ESCC-0559	TP53	17	7578291	7578291	T	C	Splice_Site	-	-	17	7579471	7579472	-	C	Frame_Shift_Ins	c.215_216insG	p.P72fs	-	-	-
ESCC-0031	TP53	17	7579299	7579322	CAGGGCAACTGACCGTGCAAGTCA	-	Splice_Site	c.365_376delTGACTTGCACGGTCAGTTGCCCTG	p.122_126VTCTV>V	17	7577538	7577538	C	T	Missense_Mutation	c.743G>A	p.R248Q	-	-	-
ESCC-0315	TP53	17	7578552	7578552	G	T	Nonsense_Mutation	c.378C>A	p.Y126*	17	7578290	7578290	C	G	Splice_Site	-	-	-	-	-
ESCC-0038	TP53	17	7577538	7577538	C	T	Missense_Mutation	c.743G>A	p.R248Q	17	7578413	7578413	C	T	Missense_Mutation	c.517G>A	p.V173M	-	-	-
ESCC-0095	TP53	17	7574023	7574034	CGCCCACGGATC	-	Splice_Site	c.994_1004delGATCCGTGGGCG	p.DPWA332del	17	7577547	7577547	C	T	Missense_Mutation	c.734G>A	p.G245D	-	-	-
ESCC-0227	SAMD9L	7	92763729	92763729	C	G	Missense_Mutation	c.1556G>C	p.R519T	7	92762202	92762202	C	G	Missense_Mutation	c.3083G>C	p.R1028T	-	-	-
ESCC-0105	TP53	17	7578395	7578395	G	A	Missense_Mutation	c.535C>T	p.H179Y	17	7578190	7578190	T	C	Missense_Mutation	c.659A>G	p.Y220C	-	-	-
ESCC-0272	TP53	17	7576857	7576857	A	T	Missense_Mutation	c.989T>A	p.L330H	17	7577568	7577568	C	T	Missense_Mutation	c.713G>A	p.C238Y	-	-	-
ESCC-0272	POT1	7	124503424	124503424	C	T	Missense_Mutation	c.526G>A	p.G176R	7	124481042	124481042	G	C	Missense_Mutation	c.1354C>G	p.L452V	-	-	-
ESCC-0156	TP53	17	7578188	7578188	C	A	Nonsense_Mutation	c.661G>T	p.E221*	17	7578394	7578394	T	C	Missense_Mutation	c.536A>G	p.H179R	-	-	-
ESCC-0196	TP53	17	7576853	7576853	C	T	Splice_Site	c.993G>A	p.Q331Q	17	7576897	7576897	G	A	Nonsense_Mutation	c.949C>T	p.Q317*	-	-	-
ESCC-0006	TP53	17	7577083	7577084	CT	-	Frame_Shift_Del	c.854_855delAG	p.E287fs	17	7578526	7578526	C	A	Missense_Mutation	c.404G>T	p.C135F	-	-	-
ESCC-0230	TP53	17	7574034	7574034	C	G	Splice_Site	-	-	17	7577025	7577025	T	A	Nonsense_Mutation	c.913A>T	p.K305*	-	-	-
ESCC-0175	TP53	17	7579312	7579312	C	T	Splice_Site	c.375G>A	p.T125T	17	7578394	7578394	T	C	Missense_Mutation	c.536A>G	p.H179R	-	-	-
ESCC-0380	BRCA1	17	41244844	41244844	C	G	Missense_Mutation	c.2704G>C	p.E902Q	17	41244499	41244499	C	G	Missense_Mutation	c.3049G>C	p.E1017Q	-	-	-
ESCC-0073	TP53	17	7578555	7578555	C	A	Splice_Site	-	-	17	7579493	7579494	-	T	Frame_Shift_Ins	c.193_194insA	p.R65fs	-	-	-
ESCC-0379	CDKN2A	9	21971120	21971120	G	A	Nonsense_Mutation	c.85C>T	p.R29*	-	-	-	-	-	-	-	-	9	19575001	26703801
ESCC-0291	RB1	13	48954187	48954187	A	T	Splice_Site	-	-	-	-	-	-	-	-	-	-	13	48804201	50064201
ESCC-0269	FAT1	4	187541322	187541322	G	A	Nonsense_Mutation	c.6418C>T	p.Q2140*	-	-	-	-	-	-	-	-	4	187454796	187584634
